# Supplementary material
Source: PubMed Central journal article supplement (PMC3351004)
Supplement: NIHMS374612-supplement-1_si_001.pdf [file NIHMS374612-supplement-1_si_001.pdf]

Supplementary Information for Phosphatidylserine Reversibly Binds Cu<sup>2+</sup>  
with Extremely High Affinity

*Christopher F. Monson, Xiao Cong, Aaron Robison, Hudson P. Pace, Chunming Liu,  
Matthew F. Poyton, and Paul S. Cremer*

Department of Chemistry, Texas A&M University, 3255 TAMU, College Station, Texas  
77843, United States

April 2, 2012

### Microfluidic Device

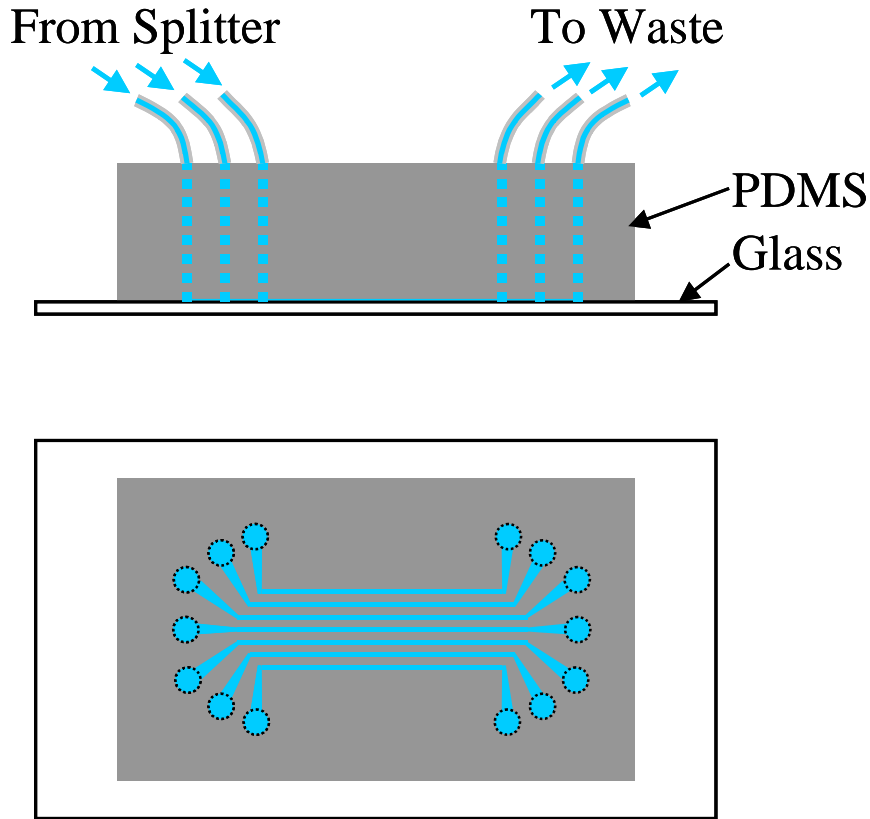

Figure S1. The microfluidic device consisted of a patterned PDMS block adhered to a glass coverslip. Buffer supply tubes from the flow splitter (schematic diagram shown in Figure S2) lead into the microfluidic device. The fabrication procedure for this microfluidic device was described in the experimental section.

## Flow Splitter Device

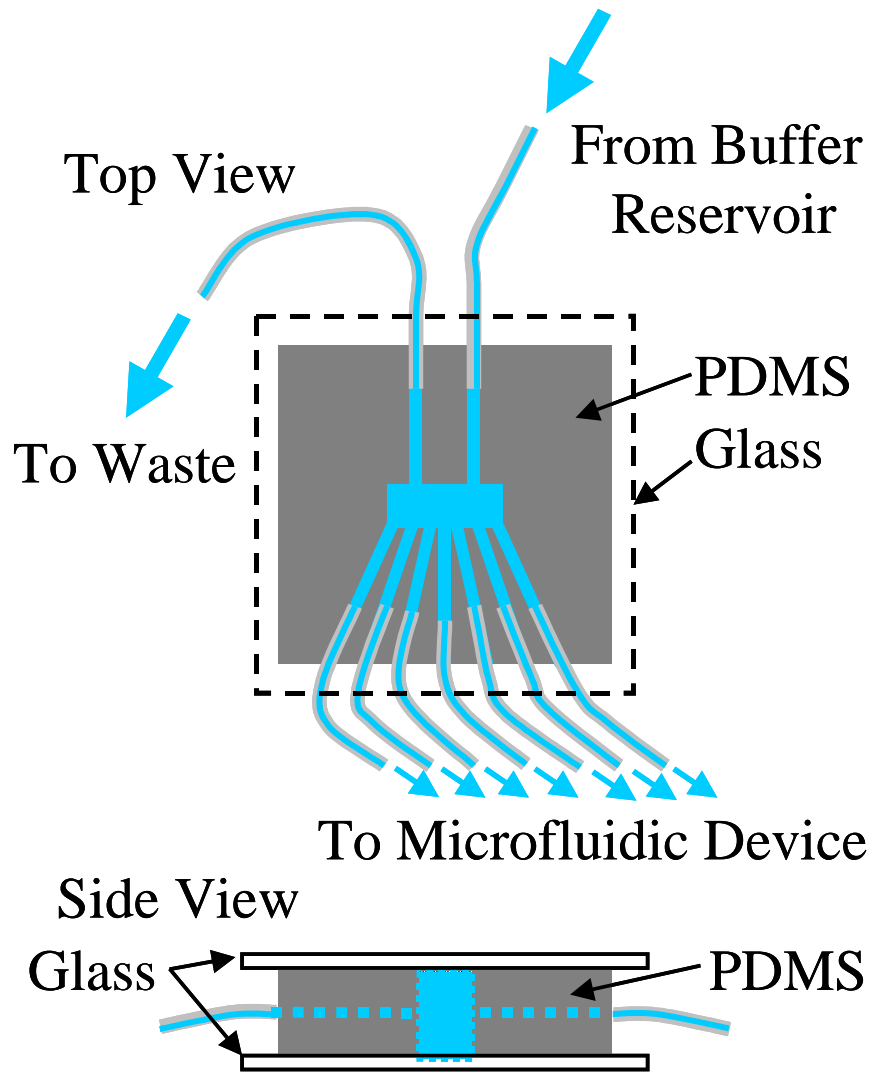

Figure S2. The flow splitter splits the gravity driven flow from a single line from a buffer reservoir into a waste line and up to seven supply lines that feed into a microfluidic channel array. The flow splitter also catches any bubbles introduced during buffer exchange.

**UV/Vis Absorbance (top) and Fluorescence Emission (bottom) of Vesicles in the Presence and Absence of  $\text{CuSO}_4$**

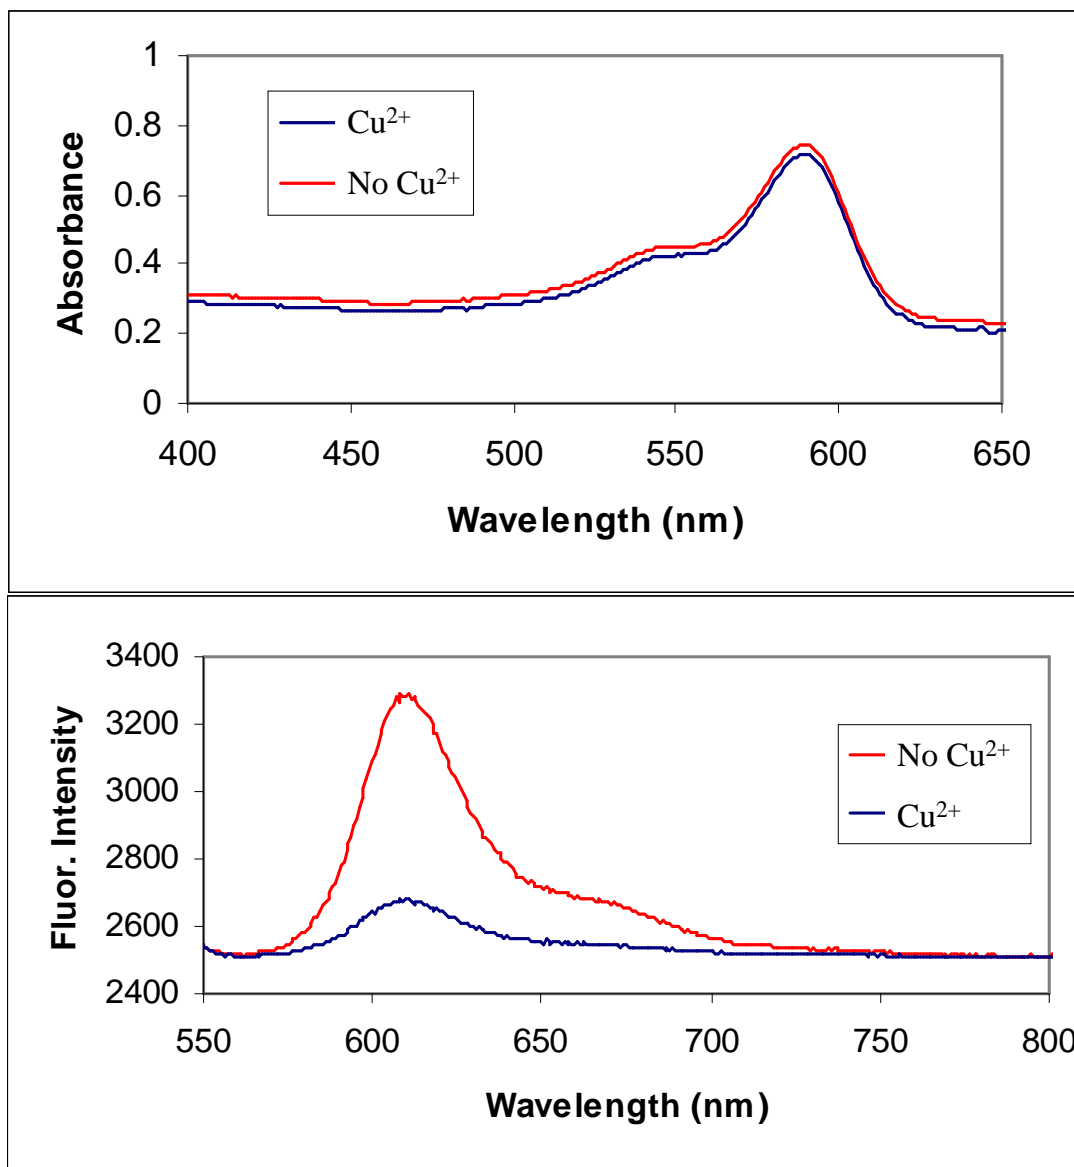

Figure S3. (top) Absorbance and (bottom) fluorescence emission spectra of 100 nm vesicles composed of 1 mol% TR-DHPE, 15 mol% DOPS and 84 mol% POPC at 1 mg/mL. The experiments were performed in 10 mM Tris buffer containing 100 mM NaCl, at pH 7.4. The red spectra show no addition of  $\text{CuSO}_4$ , while the blue spectra were taken with the addition of 100  $\mu\text{M}$   $\text{CuSO}_4$  (saturated at 1:2  $\text{Cu}^{2+}$ :PS complex). Fluorescence excitation was performed at  $\sim 525$  nm. Since the adsorption did not shift, while the fluorescence was substantially quenched, a static quenching mechanism can be ruled out.<sup>1,2</sup> Instead, the mechanism should involve dynamic quenching.

## Quenching data with Hill equation fit

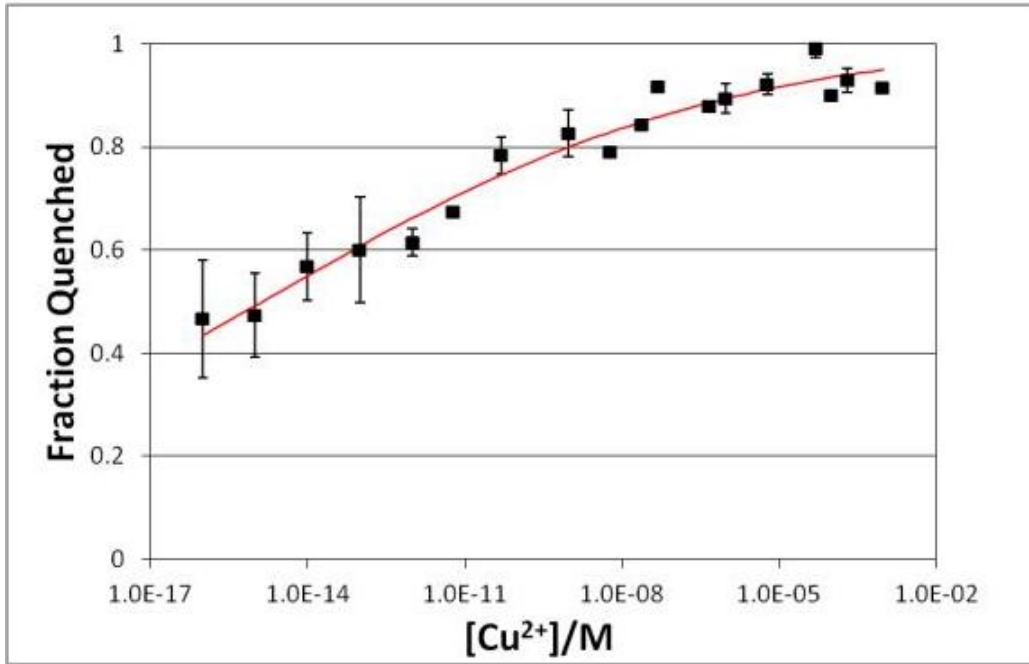

Figure S4. The data shown from Figure 4 along with a fit of the data by the Hill equation<sup>3,4</sup>:

$$\Delta F = \Delta F_{\max} \times \frac{([L])^n}{([L])^n + (K_d)^n}$$

where  $\Delta F$  is the fraction of dye that is quenched by the  $\text{Cu}^{2+}$ -PS complex (1 minus the normalized intensity),  $\Delta F_{\max}$  is the maximum fraction quenched,  $[L]$  is the bulk  $\text{Cu}^{2+}$  concentration,  $K_d$  is the apparent equilibrium dissociation constant, and  $n$  is the Hill coefficient of cooperativity.<sup>3,4</sup> The data was fit in Origin 7.5 and the  $K_d$  value obtained was  $1.8 \times 10^{-15}$  M with an error of  $1.7 \times 10^{-15}$  M. It should be noted that this fit has the greatest  $R^2$  value = 0.96 and the lowest chi-square test value = 0.0012.  $\Delta F_{\max} = 1.01 \pm 0.046$  while the Hill coefficient  $n = 0.10 \pm 0.016$ . As noted in the main text, the last four points have the greatest error bars and the purity is the water sample is difficult to characterize at femtomolar concentrations even by ICP-MS. Therefore, if trace  $\text{Cu}^{2+}$  was present in the background of the lowest four concentration it would shift the apparent fit to a tighter value. As such  $1.8 \times 10^{-15}$  M probably represents a lower bound for the equilibrium dissociation constant. On the other hand, the signal to noise is already quite good at  $1 \times 10^{-12}$  M and impurities can be easily tested at this level by ICP-MS. As such, this value is probably beyond the upper bound and the dissociation constant should be less than this and in the femtomolar range.

### Job's Plot Measurements

The Job's method<sup>5</sup> of continuous concentration variation was applied to determine the binding stoichiometry between PS and  $\text{Cu}^{2+}$ . Experiments were performed in Tris/NaCl buffer (10 mM Tris, 100 mM NaCl, pH 7.4). 100 nm POPC vesicles containing 1 mol% TR-DHPE, 0 to 15 mol% DOPS at 0.17 mg/mL were used and serial concentrations of  $\text{CuSO}_4$  ranging from 0 to 33  $\mu\text{M}$  were added during vesicle extrusion. The total molar concentration of PS and  $\text{Cu}^{2+}$  was held constant at 33  $\mu\text{M}$ , while their mole fractions were varied. The fraction of the quenched fluorescence, which is related to the amount of complex formed, was plotted against the mole fraction of  $\text{Cu}^{2+}$ . The inflection points of the Job's plot yielded the binding stoichiometry of the complexes formed. As can be seen, the maximum in fluorescence quenching occurred when the mole fraction of  $\text{Cu}^{2+}$  was about 0.33. This is consistent with 1:2 binding for the  $\text{Cu}^{2+}$ :PS complex.

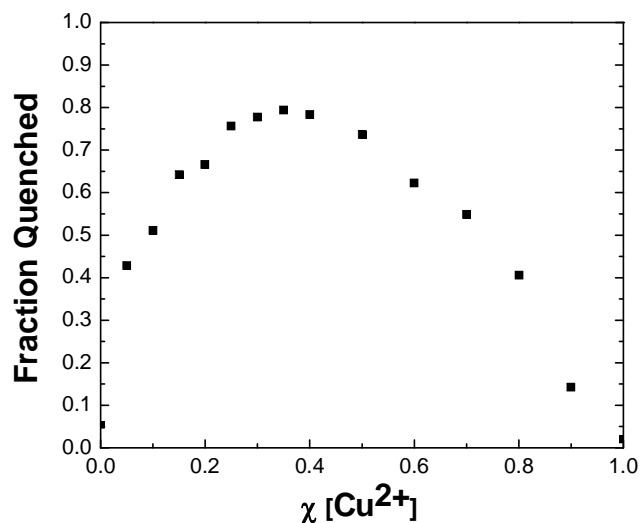

Figure S5. A Job's plot shows the binding stoichiometry of the complexes formed, which corroborates the Stern-Volmer plot in Figure 5.

## EPR Spectra of PS Vesicles, CuSO<sub>4</sub> and PS Vesicles with CuSO<sub>4</sub> in buffer.

EPR spectra were collected on an X-Band Bruker EMX Spectrometer (Bruker Biospin, Billerica, MA) with an Oxford ESR900 liquid Helium cryostat.

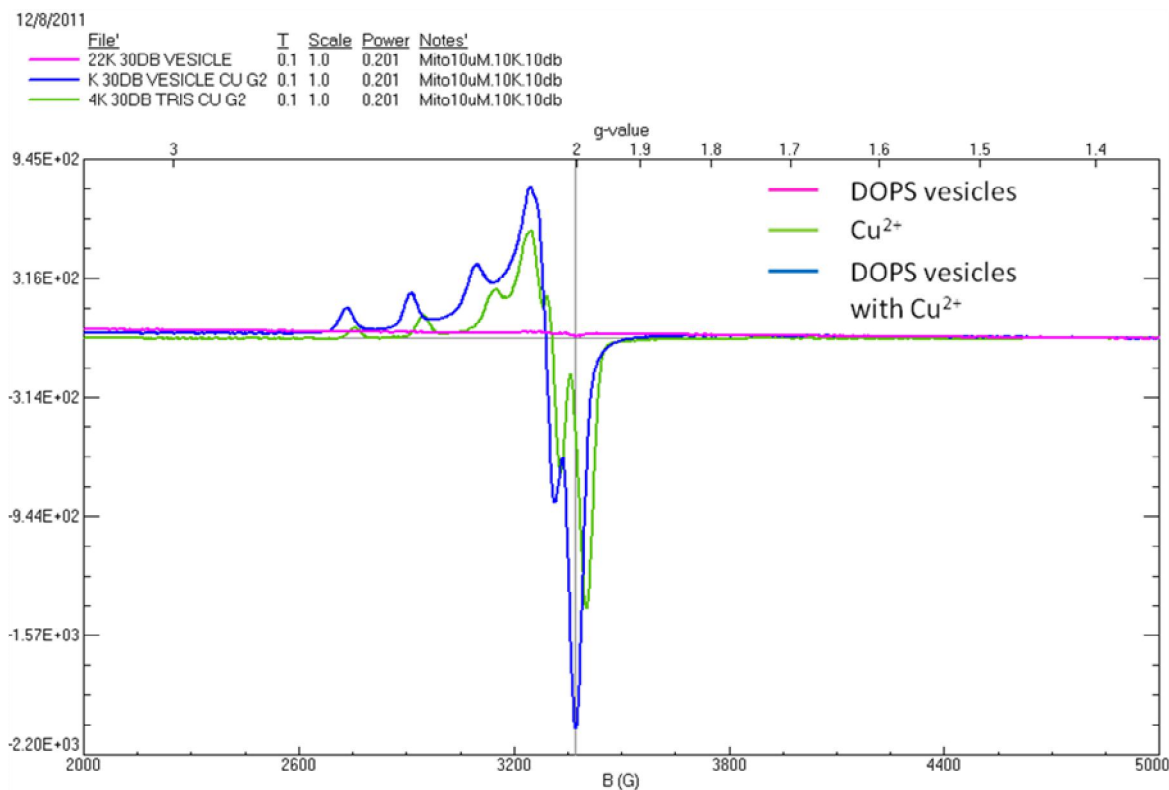

Figure S6. EPR spectra of 100 nm vesicles containing 15 mol% DOPS in POPC (pink), CuSO<sub>4</sub> (green), and DOPS vesicles with CuSO<sub>4</sub> (blue, saturated at 2:1 PS:Cu<sup>2+</sup> complex) in Tris/NaCl buffer. 10 mM Tris and 100 mM NaCl buffer at pH 7.4 were used. The  $g_{\parallel}$  value of Cu<sup>2+</sup> with vesicles is 2.252 and  $A_{\parallel}$  value is 171 gauss =  $180 \cdot 10^{-4} \text{ cm}^{-1}$  (blue), which is similar to the EPR spectra data of CuL<sub>2</sub> complexes such as with O-phospho-L-serine.<sup>6,7</sup> Indeed, the shift in the EPR signal when adding PS vesicles shows that a change in copper complexation took place.

## Metal Ion Quenching of TR-DHPE with vesicles containing no PS

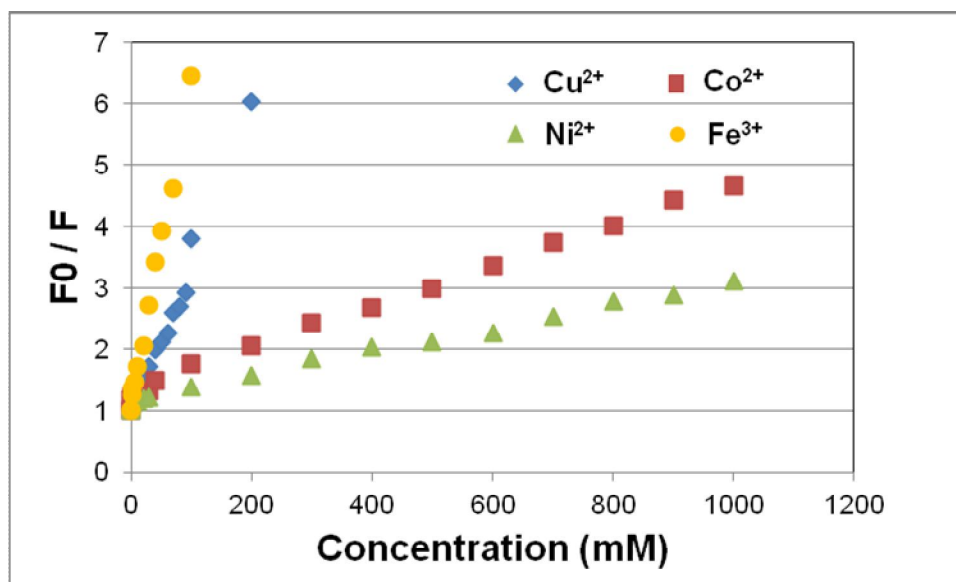

Figure S7. Stern-Volmer plots of the metal ion quenching of 100 nm POPC vesicles containing 1 mol% TR-DHPE. Various metal ions as chloride salts were added into vesicle solution in 1 M Tris with 100 mM NaCl at pH 7.4. As no PS was present, the quenching was due only to direct metal ion interactions with fluorophores and the concentrations of Cu<sup>2+</sup> required for quenching was 9 orders of magnitude higher or more. Additionally, Ca<sup>2+</sup>, Mg<sup>2+</sup>, Ba<sup>2+</sup>, Zn<sup>2+</sup>, Cd<sup>2+</sup> and Hg<sup>2+</sup> were tested and found to result in no measurable quenching up to 10 mM concentrations.



## DOPS vs DPPS Fluorescence Quenching

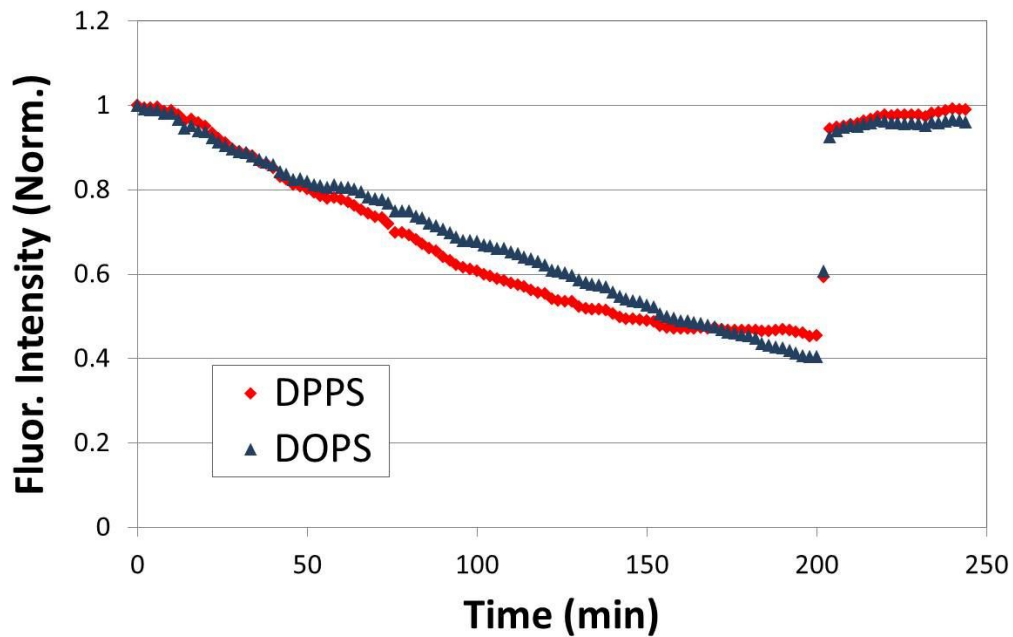

Figure S8. Quenching of TR-DHPE on SLBs by DPPS (red) or DOPS (blue) with 1 pM  $\text{CuCl}_2$  present in 1 mM citrate/MES/Tris buffer at pH 8.0. The SLBs consisted of 1 mol% TR-DHPE and 20 mol% DPPS or DOPS in POPC. After 200 min, the buffer was changed to acidic pH (pH=3.1) to observe the reversible dequenching process.

## Protein-bound Fluorescence Response to DOPS

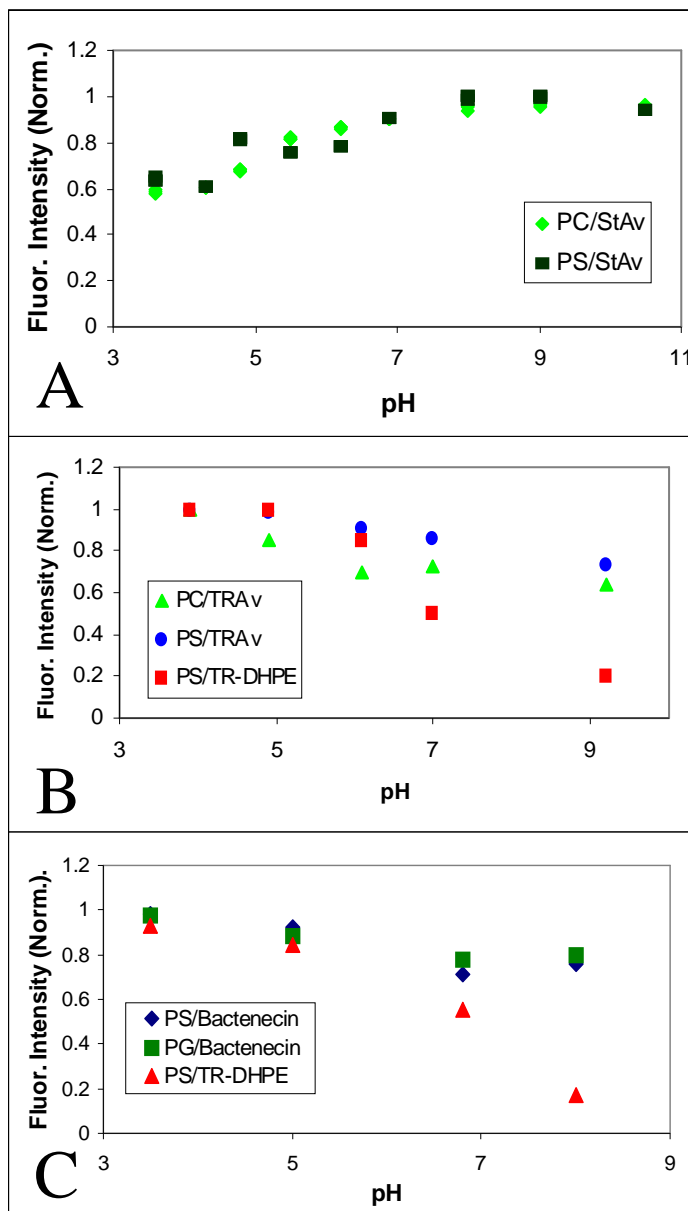

Figure S9. (A) The fluorescence response of supported bilayers in microfluidic channels after flowing in Alexa 488-labeled streptavidin (StAv), (B) Texas Red-labeled avidin (TRAv) and (C) a rhodamine-labeled bactenecin derivative peptide as a function of pH. The data were taken with 100 nM  $\text{CuSO}_4$  in the presence of 20 mol% DOPS (where PS is indicated) in POPC with a 10 mM citric acid/tris buffer adjusted to the appropriate pH with HCl and NaOH. The avidin and streptavidin bound to biotinylated DOPE, present at 1 mol% in the supported bilayers. The bactenecin was added at 20  $\mu\text{M}$  and spontaneously bound to the SLBs. In the PG/Bactenecin experiment, POPG was present at 20 mol% in the control experiment (green squares in C).

### FRAP Data for PS and No PS SLBs

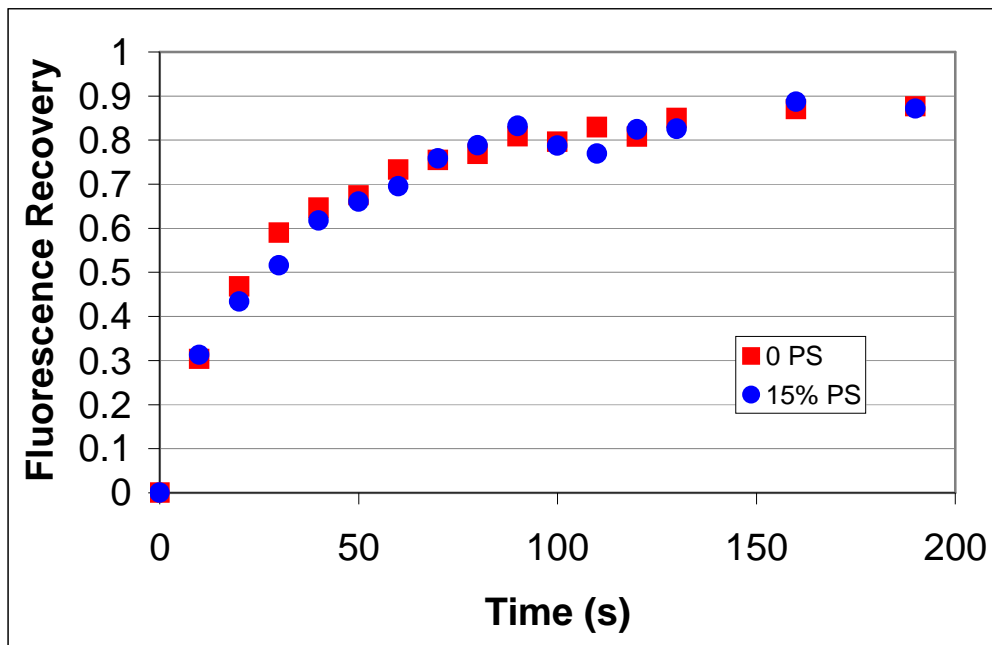

Figure S10. Typical fluorescence recovery after photobleaching (FRAP) curves obtained for an SLB containing 1 mol% TR-DHPE, 99 mol% POPC, and no PS (red) and 1 mol% TR-DHPE, 84 mol% POPC, and 15 mol% DOPS (blue) in a pH 7.4 citrate/Tris buffer (1 mM). The calculated diffusion constant was  $\sim 1.7 \mu\text{m}^2/\text{s}$ . The mobile fraction was generally observed to be greater than 0.9, although at the highest concentrations of PS (30 mol%) 0.8-0.85 mobile fractions were observed.

**Supplementary Table S1: ICP-MS results of the nanopure water used in all the exp.**

Nanopure water used in exp.

(All in pM)

|    |       |
|----|-------|
| Cu | <0.01 |
| Mg | <0.01 |
| Ni | 2     |
| Zn | 60    |
| Br | <0.1  |
| P  | <0.1  |
| Cl | 4000  |
| K  | 6     |
| Fe | 100   |

The ICP-MS data of the nanopure water used in the experiments were collected on Perkin Elmer DRCII ICP-MS with both solution and laser ablation capabilities.

## Supplementary Table S2: Lipids and Fluorophores Tested

| Lipids Tested    |                         | Fluorophores Tested                                  |
|------------------|-------------------------|------------------------------------------------------|
| Quenches TR-DHPE | Does not quench TR-DHPE | (All quenched by DOPS)                               |
| DOPS             | GM1                     | TR-DHPE (ortho- and para-isomers, mixed or separate) |
| DLPS             | DOPG                    | 16:12 Tail-Labeled NBD PC                            |
| DPPS             | DPPG                    | 16:12 Tail-Labeled NBD PS                            |
|                  | POPG                    | 18:1 Head-Labeled NBD PS                             |
|                  | Cardiolipin             | Rhodamine-DHPE                                       |
|                  | DOPA                    | Fluorescein-DHPE                                     |
|                  | DSPA                    | Bodipy-DHPE                                          |

Quenching was determined for the lipids in column 1 (PS lipids) and column 2 (non-PS lipids) by the observed fluorescence difference between the lipid present and absent at pH 3.6 and 8.0. The PS species were tested at 15 mol% and all quenched TR-DHPE present at 1 mol%. For the non-quenching lipids, the concentrations tested were either 5 mol% (GM1 and cardiolipin) or 15 mol% (the other lipids). Again, the dye employed was TR-DHPE present at 1 mol%.

The fluorophores were tested at 1 mol% (TR-DHPE, Rhodamine-DHPE, Fluorescein-DHPE, 16:12 tail-labeled NBD PC, 16:12 tail-labeled NBD PS and 18:1 head-labeled NBD PS) or 2 mol% (Bodipy-DHPE), with 15 mol% DOPS-containing bilayers compared to bilayers containing no DOPS. In both cases, the balance of the SLB

consisted of POPC. Moreover, 10 mM sodium citrate/Tris buffers were used with 800 pM CuSO<sub>4</sub> in all cases.

### A List of Chemical name

| Abbreviation                         | Chemical name                                                                                                |
|--------------------------------------|--------------------------------------------------------------------------------------------------------------|
| <b>DOPS</b>                          | 1,2-dioleoyl- <i>sn</i> -glycero-3-phospho-L-serine                                                          |
| <b>DLPS</b>                          | 1,2-dilauroyl- <i>sn</i> -glycero-3-phospho-L-serine                                                         |
| <b>DPPS</b>                          | 1,2-dipalmitoyl- <i>sn</i> -glycero-3-phospho-L-serine                                                       |
| <b>GM1</b>                           | mixed gangliosides, purified, bovine                                                                         |
| <b>Cardiolipin</b>                   | 1,1',2,2'-tetramyristoyl cardiolipin                                                                         |
| <b>DOPG</b>                          | 1,2-dioleoyl- <i>sn</i> -glycero-3-phospho-(1'- <i>rac</i> -glycerol)                                        |
| <b>DPPG</b>                          | 1,2-dipalmitoyl- <i>sn</i> -glycero-3-phospho-(1'- <i>rac</i> -glycerol)                                     |
| <b>POPG</b>                          | 1-palmitoyl-2-oleoyl- <i>sn</i> -glycero-3-phospho-(1'- <i>rac</i> -glycerol)                                |
| <b>DOPA</b>                          | 1,2-dioleoyl- <i>sn</i> -glycero-3-phosphate                                                                 |
| <b>DSPA</b>                          | 1,2-distearoyl- <i>sn</i> -glycero-3-phosphate                                                               |
| <b>TR-DHPE</b>                       | Texas Red 1,2-dihexadecanoyl- <i>sn</i> -glycero-3-phosphoethanolamine                                       |
| <b>16:12 tail-labeled<br/>NBD PC</b> | (1-palmitoyl-2-{12-[(7-nitro-2-1,3-benzoxadiazol-4-yl)amino]dodecanoyl}- <i>sn</i> -glycero-3-phosphocholine |
| <b>16:12 tail-labeled<br/>NBD PS</b> | 1-palmitoyl-2-{12-[(7-nitro-2-1,3-benzoxadiazol-4-yl)amino]dodecanoyl}- <i>sn</i> -glycero-3-phosphoserine   |
| <b>18:1 head-labeled<br/>NBD PS</b>  | 1,2-dioleoyl- <i>sn</i> -glycero-3-phospho-L-serine-N-(7-nitro-2-1,3-benzoxadiazol-4-yl)                     |

---

|                         |                                                                                                                                       |
|-------------------------|---------------------------------------------------------------------------------------------------------------------------------------|
| <b>Rhodamine-DHPE</b>   | Lissamine Rhodamine B 1,2-dihexadecanoyl- <i>sn</i> -glycero-3-phosphoethanolamine                                                    |
| <b>Fluorescein-DHPE</b> | N-(Fluorescein-5-thiocarbamoyl)-1,2-dihexadecanoyl- <i>sn</i> -glycero-3-phosphoethanolamine                                          |
| <b>Bodipy-DHPE</b>      | (N-(4,4-difluoro-5,7-dimethyl-4-bora-3a,4a-diaza-s-indacene-3-propionyl)-1,2-dihexadecanoyl- <i>sn</i> -glycero-3-phosphoethanolamine |

---

## **Image Processing**

Line scans of images were exported to Excel, where peak heights were determined by subtracting the average of the PDMS-glass junction fluorescence intensity on either side of a channel from the average intensity inside of the channel itself. The variation reported in the paper, particularly in Figure 3, is the variation observed between multiple measurements. The number of measurements varied, but typically was between three and seven.

## **CuSO<sub>4</sub> Extrusion with Vesicles**

As noted in the experimental section, CuSO<sub>4</sub> was generally added to the buffer for measurements of fluorescence quenching in 100 nm vesicles with 15 mol% DOPS (Figure 5). As a control, experiments were also performed by introducing CuSO<sub>4</sub> after vesicle extrusion. This should only quench fluorophores on the outer leaflet. Indeed, quenching was diminished in such controls, but by usually less than a factor of two. This may be due to a preferential partitioning by Texas Red DHPE to the outer leaflet of the vesicles, since the head group larger is larger than the surrounding POPC lipids. Also, the surface area of the outer leaflet is somewhat greater than the inner leaflet in 100 nm vesicles. Finally, some leakage of the vesicles could also cause the quenching difference to be somewhat less than a factor of two.



## References

- (1) Crane, J. M.; Tamm, L. K *Biophys. J.* **2004**, *86*, 2965.
- (2) Lakowicz, J. R. *Principles of Fluorescence Spectroscopy*; 3rd Edition ed.; Springer Science+Business Media: New York, 2006.
- (3) Shi, J. J.; Yang, T. L.; Kataoka, S.; Zhang, Y. J.; Diaz, A. J.; Cremer, P. S. *J. Am. Chem. Soc.* **2007**, *129*, 5954.
- (4) Lencer, W. I.; Chu, S. H. W.; Walker, W. A. *Infect. Immun.* **1987**, *55*, 3126.
- (5) Job, P. *Ann. Chim.* **1928**, *9*, 113.
- (6) Jastrzab, R.; Lomozik, L. *J. Coord. Chem.* **2009**, *62*, 710.
- (7) Várnagy, K.; Garribba, E.; Sanna, D.; Sóvágó, I.; Micera, G. *Polyhedron* **2005**, *24*, 799.
